# Supplementary material for: An enhanced low-frequency vibration ZnO nanorod-based tuning fork piezoelectric nanogenerator
Source: Royal Society of Chemistry journal article supplement (doi:10.1039/c7nr07325a), 2017-12-04
Supplement: c7nr07325a1.pdf [file c7nr07325a1.pdf]

Supplementary Materials for

## Enhanced Low-frequency Vibration ZnO nanorods-based Tuning Fork Piezoelectric Nanogenerator

*Weili Deng, <sup>†</sup> Long Jin, <sup>†</sup> Yueqi Chen, <sup>§</sup> Wenjun Chu, <sup>§</sup> Binbin Zhang, <sup>†</sup> Huan Sun, <sup>†</sup> Da*

*Xiong, <sup>†</sup> Zekai Lv, <sup>§</sup> Minhao Zhu, <sup>†, #</sup> Weiqing Yang, <sup>†, \*</sup>*

<sup>†</sup>Key Laboratory of Advanced Technologies of Materials (Ministry of Education),  
School of Materials Science and Engineering, <sup>§</sup>School of Mechanical Engineering,  
<sup>§</sup>Mao Yisheng Honors College, <sup>#</sup>State Key Laboratory of Traction Power, Southwest  
Jiaotong University, Chengdu 610031, China.

### Corresponding Author

\*Weiqing Yang. Correspondence to: [wqyang@swjtu.edu.cn](mailto:wqyang@swjtu.edu.cn)

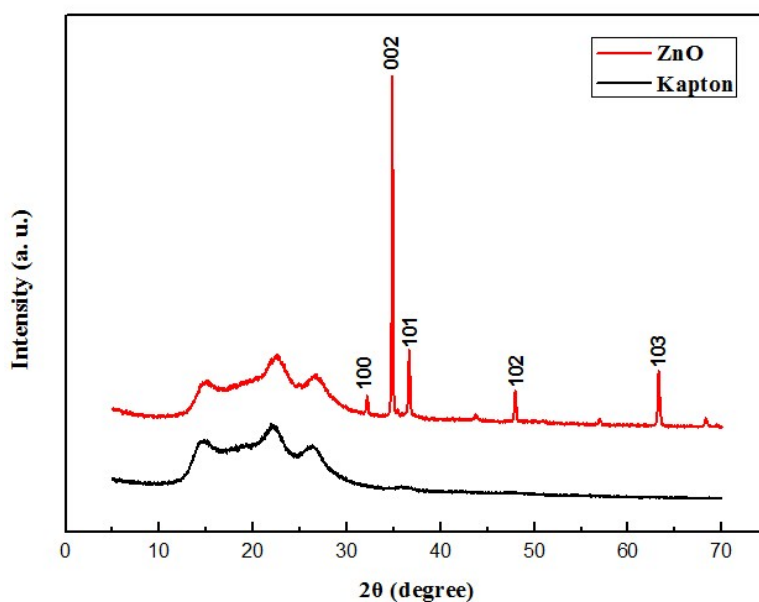

Fig. S1. XRD analysis results of ZnO NRs on a flexible Kapton substrate (top, red) and the Kapton substrate (bottom, black)
